# Supplementary material for: Effects of Alberta Family Integrated Care (FICare) on Preterm Infant Development: Two Studies at 2 Months and between 6 and 24 Months Corrected Age
Source: MDPI journal article supplement (doi:10.3390/jcm11061684), 2022-03-18
Supplement: s1 [file s1]

**Supplementary Table S1.** Study 1 hierarchical regression models of variables associated with risk of delay in each developmental domain at 2 months corrected age.

| Variable                             |                                     | Odds Ratio | 95% Confidence Interval | p-value |
|--------------------------------------|-------------------------------------|------------|-------------------------|---------|
| <b>Communication Domain</b>          |                                     |            |                         |         |
| Group                                | Standard care                       | 1.00       |                         |         |
|                                      | Alberta FICare™                     | 0.13       | 0.00–4.12               | 0.25    |
| Hospital type                        | Regional                            | 1.00       |                         |         |
|                                      | Urban                               | 0.11       | 0.00–7.62               | 0.31    |
| Singleton/twin                       | Singleton                           | 1.00       |                         |         |
|                                      | Twin                                | 1.02       | 0.02–51.86              | 0.99    |
| Income                               | < \$80,000                          | 1.00       |                         |         |
|                                      | ≥ \$80,000                          | 0.42       | 0.01–18.39              | 0.65    |
|                                      | Prefer not to answer/<br>don't know | 0.35       | 0.00–77.63              | 0.70    |
| Mother's age                         |                                     | 0.91       | 0.66–1.26               | 0.57    |
| STAI Trait Anxiety <sup>a</sup>      |                                     | 0.97       | 0.80–1.17               | 0.75    |
| PSI-4-SF Parental Distress           |                                     | 0.94       | 0.72–1.24               | 0.68    |
| PSI-4-SF Dysfunctional Interaction   |                                     | 1.38       | 0.84–2.28               | 0.20    |
| PSI-4-SF Difficult Child             |                                     | 1.02       | 0.66–1.56               | 0.93    |
| <b>Problem Solving Domain</b>        |                                     |            |                         |         |
| Group                                | Standard care                       | 1.00       |                         |         |
|                                      | Alberta FICare™                     | 2.57       | 0.13–49.32              | 0.53    |
| Birth hospitalization length of stay |                                     | 1.12       | 0.97–1.30               | 0.12    |
| Education                            |                                     | 0.68       | 0.11–3.99               | 0.67    |
| EPDS                                 |                                     | 1.07       | 0.58–1.99               | 0.83    |
| STAI State Anxiety                   |                                     | 0.95       | 0.71–1.27               | 0.71    |
| STAI Trait Anxiety <sup>a</sup>      |                                     | 1.00       | 0.83–1.21               | 0.99    |
| PSI-4-SF Parental Distress           |                                     | 1.00       | 0.77–1.29               | 0.98    |
| PSI-4-SF Dysfunctional Interaction   |                                     | 1.16       | 0.76–1.77               | 0.50    |
| PSI-4-SF Difficult Child             |                                     | 0.93       | 0.64–1.36               | 0.72    |
| <b>Personal-Social Domain</b>        |                                     |            |                         |         |
| Group                                | Standard care                       | 1.00       |                         |         |
|                                      | Alberta FICare™                     | 0.69       | 0.26–1.85               | 0.47    |
| Mother's age                         |                                     | 0.92       | 0.82–1.02               | 0.11    |
| EPDS                                 |                                     | 0.94       | 0.77–1.15               | 0.57    |
| STAI State Anxiety                   |                                     | 1.06       | 0.97–1.17               | 0.21    |
| STAI Trait Anxiety <sup>a</sup>      |                                     | 1.03       | 0.96–1.10               | 0.45    |
| PSI-4-SF Parental Distress           |                                     | 0.99       | 0.91–1.08               | 0.80    |
| PSI-4-SF Dysfunctional Interaction   |                                     | 1.11       | 0.95–1.29               | 0.19    |
| PSI-4-SF Difficult Child             |                                     | 1.01       | 0.90–1.14               | 0.84    |

Abbreviations: Alberta FICare™, Alberta Family Integrated Care™; STAI, State-Trait Anxiety Inventory; PSI-4-SF, Parenting Stress Index, Fourth Edition Short Form; EPDS, Edinburgh Postnatal Depression Scale. Note: Bold used to delineate categories for measurement scales. <sup>a</sup> measured only at admission to NICU.

**Supplementary Table S2.** Study 2 hierarchical regression models of variables associated with risk of delay in each developmental domain between 6 and 24 months corrected age.

| Variable                           |                                     | Odds Ratio | 95% Confidence Interval | p-value |
|------------------------------------|-------------------------------------|------------|-------------------------|---------|
| <b>Communication Domain</b>        |                                     |            |                         |         |
| Group                              | Standard care                       | 1.00       |                         |         |
|                                    | Alberta FICare™                     | 0.09       | 0.01-0.62               | 0.01    |
| Mother born in Canada              | No                                  | 1.00       |                         |         |
|                                    | Yes                                 | 0.17       | 0.04-0.76               | 0.02    |
| Mother's age                       |                                     | 1.00       | 0.96-1.40               | 0.13    |
| <b>Problem Solving Domain</b>      |                                     |            |                         |         |
| Group                              | Standard care                       | 1.00       |                         |         |
|                                    | Alberta FICare™                     | 0.10       | 0.00-6.04               | 0.27    |
| STAI Trait Anxiety <sup>a</sup>    |                                     | 1.14       | 0.93-1.41               | 0.21    |
| PSI-4-SF Dysfunctional Interaction |                                     | 1.21       | 0.86-1.70               | 0.27    |
| <b>Personal-Social Domain</b>      |                                     |            |                         |         |
| Group                              | Standard care                       | 1.00       |                         |         |
|                                    | Alberta FICare™                     | 0.77       | 0.06-9.16               | 0.84    |
| Singleton/twin                     | Singleton                           | 1.00       |                         |         |
|                                    | Twin                                | 5.22e+08   | -                       | 0.997   |
| Income                             | < \$80,000                          | 1.00       |                         |         |
|                                    | ≥ \$80,000                          | 0.12       | 0.01-1.41               | 0.09    |
|                                    | Prefer not to answer/<br>don't know | 1.11e-08   | -                       | 0.99    |
| Employment                         |                                     | 23.40      | 1.00-545.50             | 0.05    |
| Birth weight                       |                                     | 1.00       | 1.00-1.01               | 0.08    |
| STAI Trait Anxiety <sup>a</sup>    |                                     | 1.03       | .90-1.18                | 0.69    |
| PSI-4-SF Difficult Child           |                                     | 1.44       | 1.01-2.05               | 0.04    |

Abbreviations: Alberta FICare, Family Integrated Care™; STAI, State-Trait Anxiety Inventory; PSI-4-SF, Parenting Stress Index, Fourth Edition Short Form. Note: Bold used to delineate categories for measurement scales. <sup>a</sup> measured only at admission to NICU.
